# Supplementary material for: Identification of Potential Leptospira Phosphoheptose Isomerase Inhibitors Through Virtual High-Throughput Screening
Source: PubMed Central journal article supplement — Genomics Proteomics Bioinformatics. 2011 Mar 5;8(4):246–55. doi: 10.1016/S1672-0229(10)60026-5 (PMC5054147; doi:10.1016/s1672-0229(10)60026-5), 2011-03-05
Supplement: mmc1.pdf [file mmc1.pdf]

## Supplementary Material

Umamaheswari, A., *et al.* 2010. Identification of potential *Leptospira* phosphoheptose isomerase inhibitors through virtual high-throughput screening. *Genomics Proteomics Bioinformatics* 8(4): 246-255.

DOI: 10.1016/S1672-0229(10)60026-5

Figures S1-S3; Table S1

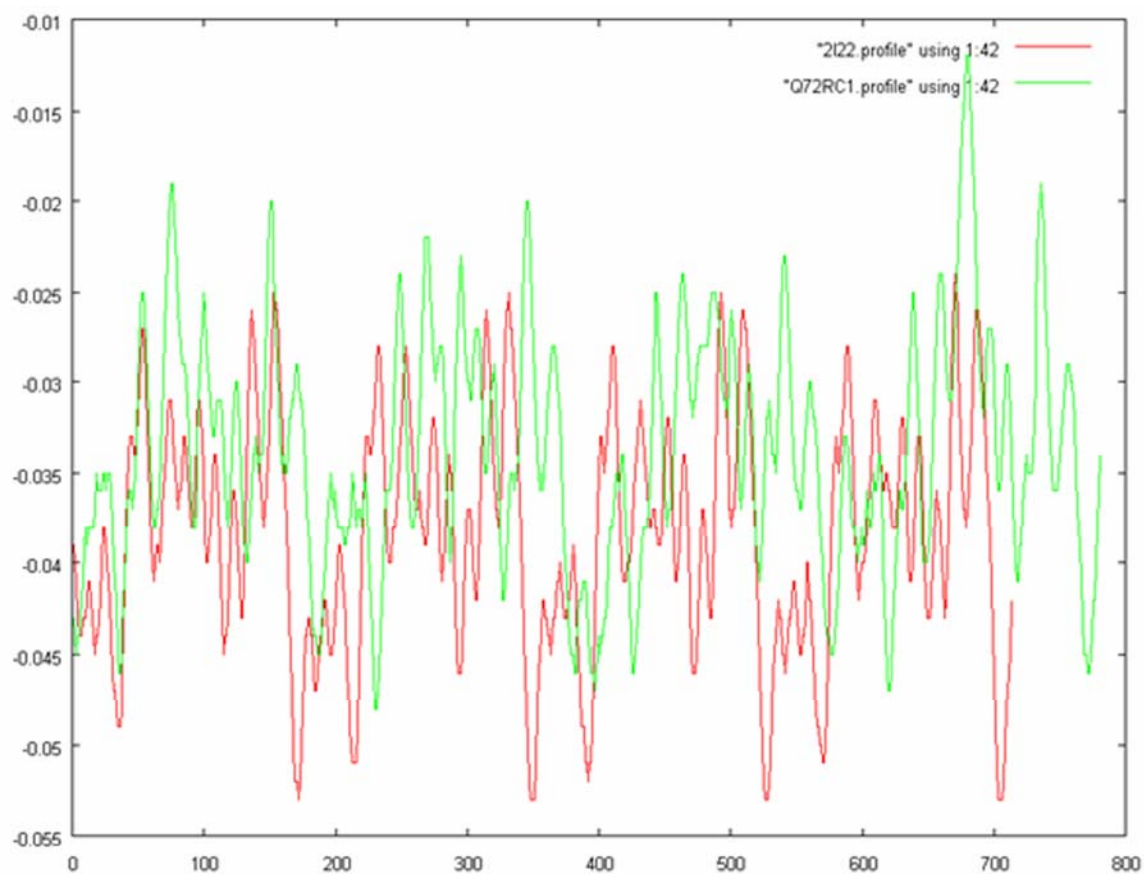

**Figure S1** Graphical representation of discrete optimized protein energy (DOPE) score profiles for the model (green) and templates (PDB ID: 2I22) (red).

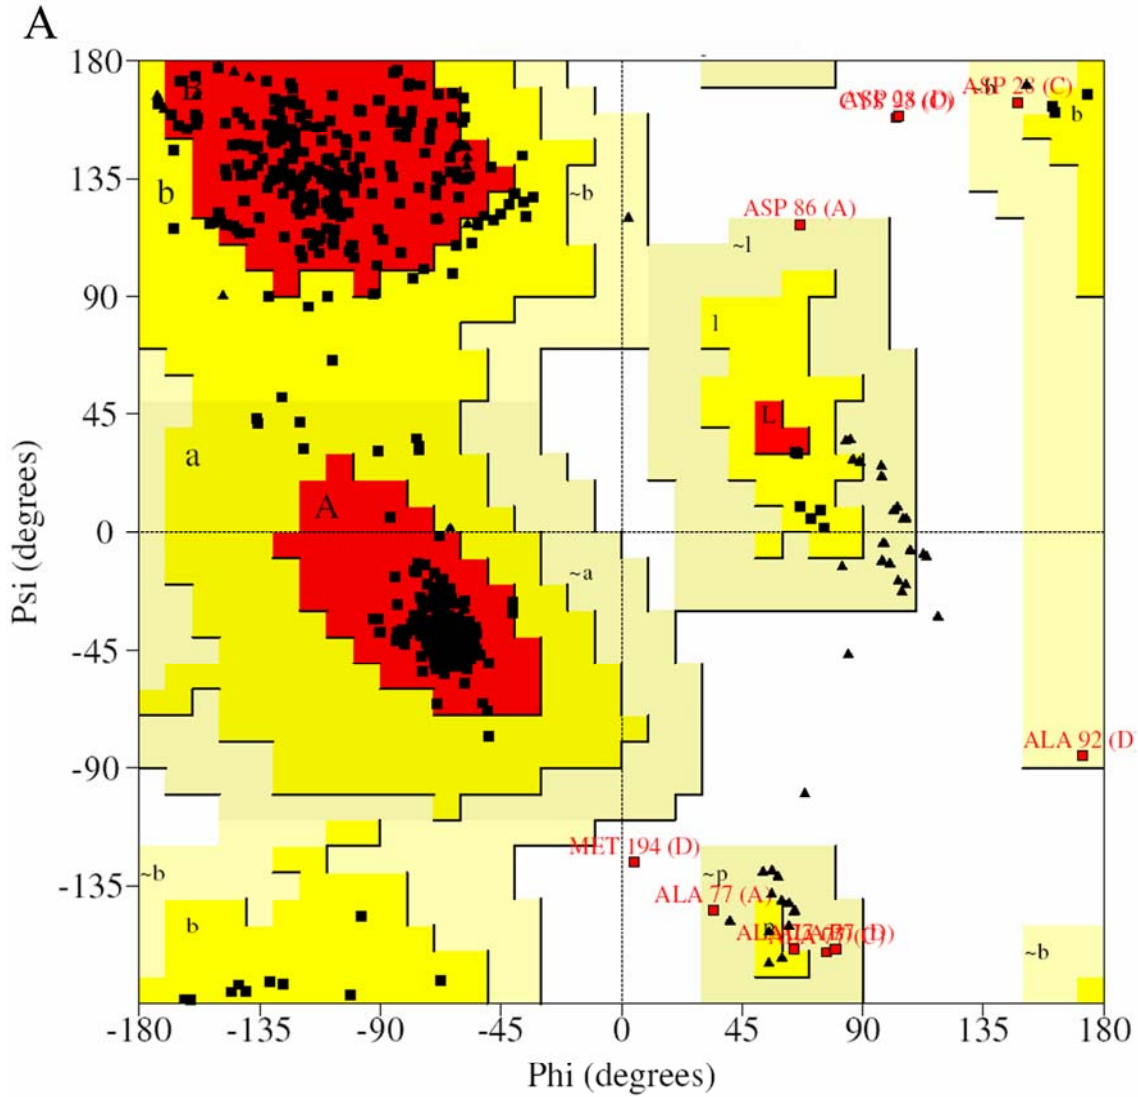

Plot statistics

|                                                      |     |        |
|------------------------------------------------------|-----|--------|
| Residues in most favoured regions [A,B,L]            | 631 | 91.2%  |
| Residues in additional allowed regions [a,b,l,p]     | 51  | 7.4%   |
| Residues in generously allowed regions [-a,-b,-l,-p] | 7   | 1.0%   |
| Residues in disallowed regions                       | 3   | 0.4%   |
| -----                                                |     |        |
| Number of non-glycine and non-proline residues       | 692 | 100.0% |
| Number of end-residues (excl. Gly and Pro)           | 8   |        |
| Number of glycine residues (shown as triangles)      | 72  |        |
| Number of proline residues                           | 8   |        |
| -----                                                |     |        |
| Total number of residues                             | 780 |        |

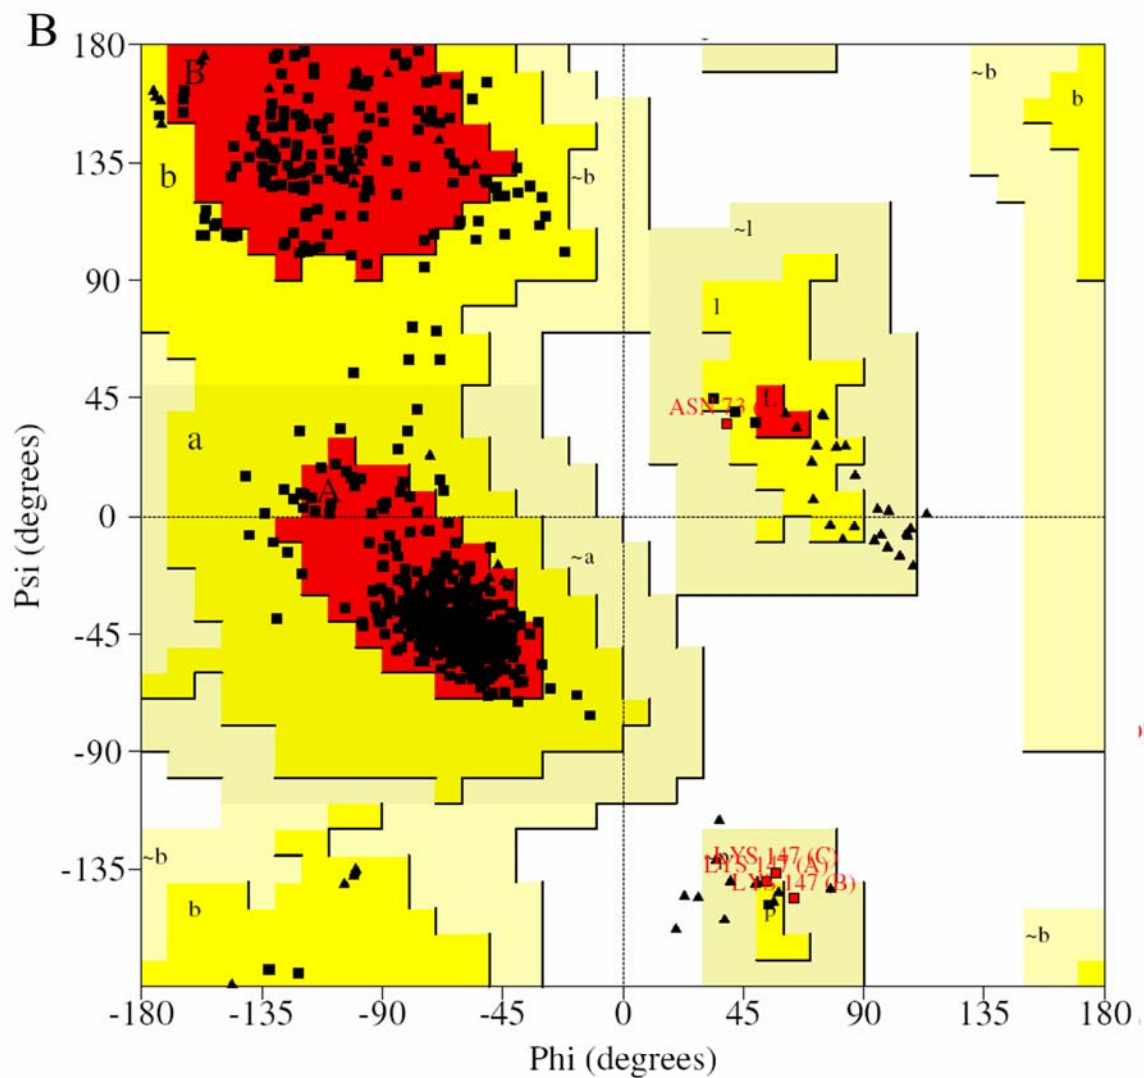

|                                                      |     |        |
|------------------------------------------------------|-----|--------|
| Residues in most favoured regions [A,B,L]            | 556 | 90.1%  |
| Residues in additional allowed regions [a,b,l,p]     | 57  | 9.2%   |
| Residues in generously allowed regions [-a,-b,-l,-p] | 4   | 0.6%   |
| Residues in disallowed regions                       | 0   | 0.0%   |
| -----                                                |     |        |
| Number of non-glycine and non-proline residues       | 617 | 100.0% |
| Number of end-residues (excl. Gly and Pro)           | 16  |        |
| Number of glycine residues (shown as triangles)      | 68  |        |
| Number of proline residues                           | 12  |        |
| -----                                                |     |        |
| Total number of residues                             | 713 |        |

**Figure S2** A. Procheck evaluation report of GmhA 3D model. **B.** Procheck evaluation report of Template 2I22.



**Table S1 Structure, smiles and docking scores of predicted 14 novel competitive inhibitors designed for GmhA of *Leptospira* serovars**

| No. | Lead structure                                                                      | Lead smiles                                                                                     | M.W.<br>(Dalton) | Glide score<br>(Kcal/mol) | Glide score after<br>Glu64→Asp64 |
|-----|-------------------------------------------------------------------------------------|-------------------------------------------------------------------------------------------------|------------------|---------------------------|----------------------------------|
| 1   | 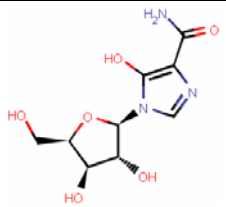   | <chem>NC(=O)C1=C(O)N(C=N1)[C@@H]2O[C@H](CO)[C@H](O)[C@H]2O</chem>                               | 259.22           | -8.39                     | -7.09                            |
| 2   |    | <chem>CCCCC[C@@H](O)C=C\C[C@@H]1[C@@H](O)CC(=O)[C@H]1C\C=C\C</chem><br><chem>CCC([O-])=O</chem> | 351.46           | -8.04                     | -6.08                            |
| 3   |   | <chem>CCCCCCCC1=CC=C(O[C@@H]2O[C@@H](CO)[C@H](O)[C@@H](O)[</chem><br><chem>C@@H]2O)C=C1</chem>  | 354.44           | -7.93                     | -6.88                            |
| 4   |  | <chem>CN[C@H]1[C@H](O)O[C@H](CO)[C@@H](O)[C@@H]1O</chem>                                        | 193.2            | -7.66                     | -5.80                            |

|   |                                                                                     |                                                                                      |        |       |       |
|---|-------------------------------------------------------------------------------------|--------------------------------------------------------------------------------------|--------|-------|-------|
| 5 |    | <chem>N[C@@H]1[C@@H](O)OC[C@H](O)[C@H]1O</chem>                                      | 149.15 | -7.60 | -6.87 |
| 6 |    | <chem>OC[C@H]1O[C@@H](O)[C@H](O)[C@@H](O)[C@@H]1S</chem>                             | 196.22 | -7.56 | -6.47 |
| 7 |    | <chem>OC[C@@H]1O[C@@H](OC2=CC=C(Cl)C=C2)[C@H](O)[C@@H](O)[C@H]1O</chem>              | 290.7  | -7.55 | -5.97 |
| 8 |  | <chem>C[C@H](O)CCC[C@@H](O)C=C\C[C@H]1[C@H](O)CC(=O)[C@@H]1C\C=C\CCCC([O-])=O</chem> | 367.46 | -7.52 | -7.11 |

|    |                                                                                    |                                                                         |        |       |       |
|----|------------------------------------------------------------------------------------|-------------------------------------------------------------------------|--------|-------|-------|
| 9  | 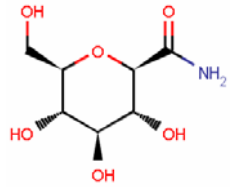  | <chem>NC(=O)[C@@H]1O[C@H](CO)[C@@H](O)[C@H](O)[C@H]1O</chem>            | 207.18 | -7.52 | -6.16 |
| 10 |   | <chem>CCCC1=CC=C(O[C@H]2O[C@H](CO)[C@@H](O)[C@H](O)[C@H]2O)C=C1</chem>  | 298.34 | -7.51 | -6.64 |
| 11 |   | <chem>[NH3+][C@@H]1OC[C@@H](O)[C@H](O)[C@H]1O</chem>                    | 148.14 | -7.50 | -7.81 |
| 12 |  | <chem>OC[C@H]1O[C@@H](NC2=CC=C(Cl)C=C2)[C@H](O)[C@@H](O)[C@@H]1O</chem> | 289.72 | -7.47 | -6.38 |



|    |                                                                                   |                                                                  |        |       |       |
|----|-----------------------------------------------------------------------------------|------------------------------------------------------------------|--------|-------|-------|
| 13 | 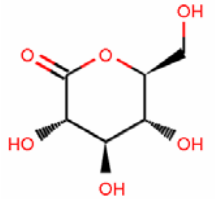 | <chem>OC[C@@H]1OC(=O)[C@@H](O)[C@H](O)[C@H]1O</chem>             | 178.14 | -7.43 | -4.93 |
| 14 |  | <chem>CN1[C@@H]2O[C@H](CO)[C@@H](O)[C@@H](O)[C@@H]2NC1=S</chem>  | 234.28 | -7.41 | -5.99 |
| 15 |  | <chem>OCC(=O)[C@@H](O)[C@H](O)[C@H](O)[C@H](O)COP(O)(O)=O</chem> | 290    | -3.41 | -3.18 |

**(Substrate S7P)**
